# Supplementary material
Source: Springer Nature journal article supplement (https://www.springermedizin.de/resource/supplementary/12916_2011_443_MOESM3_ESM.pdf/9599970)

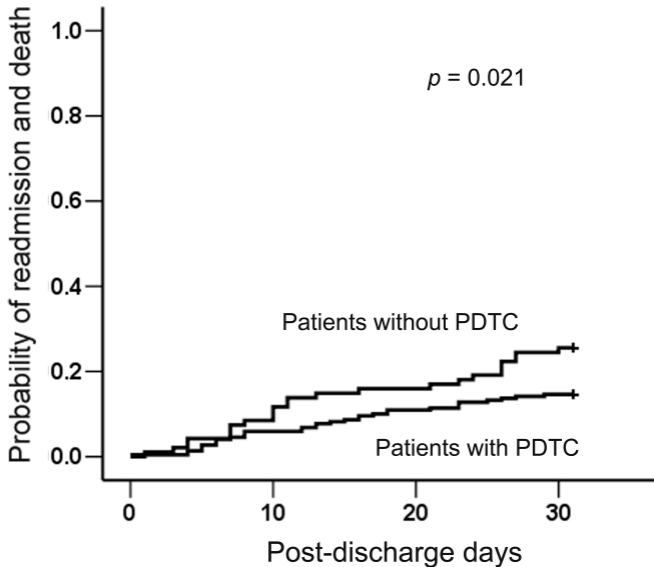

Supplement: MOESM3 [file 9599970]
